# Supplementary material
Source: PubMed Central journal article supplement (PMC2542433)
Supplement: supp_178_6_592__1.pdf [file supp_178_6_592__1.pdf]

**Decline in NRF2 regulated antioxidants in COPD lungs due to loss of its positive regulator DJ-1**

Deepti Malhotra, Rajesh Thimmulappa, Ana Navas-Acien, Andrew Sandford, Mark Elliott, Anju Singh, Linan Chen, Xiaoxi Zhuang, James Hogg, Peter Pare, Rubin M. Tudor, Shyam Biswal.

**ONLINE DATA SUPPLEMENT**

**TABLE E1. Age and gender-adjusted ratios (95% confidence intervals) of NRF2, its target antioxidants (NQO1, GCLM and HO1) and its regulators (KEAP1 and DJ-1) mRNA and protein levels in GOLD1-2 (mild COPD), and GOLD 3-4 (advanced COPD) and non-emphysematous lungs**

|                             | Non-COPD<br>(N = 26) | GOLD 1-2<br>(N = 18) | GOLD3-4<br>(N = 21) | p-value |
|-----------------------------|----------------------|----------------------|---------------------|---------|
| <b>NRF2</b>                 |                      |                      |                     |         |
| mRNA (relative fold change) | 1.00 (reference)     | 1.75 (1.20, 2.56)    | 1.07 (0.73, 1.56)   | 0.593   |
| Protein (arbitrary value)   | 1.00 (reference)     | NA                   | 0.04 (0.02, 0.06)   | <0.0001 |
| <b>NQO1</b>                 |                      |                      |                     |         |
| mRNA (relative fold change) | 1.00 (reference)     | 0.42 (0.33, 0.53)    | 0.30 (0.24, 0.37)   | <0.0001 |
| Protein (arbitrary value)   | 1.00 (reference)     | NA                   | 0.57 (0.36, 0.89)   | <0.0001 |
| <b>GCLM</b>                 |                      |                      |                     |         |
| mRNA (relative fold change) | 1.00 (reference)     | 0.30 (0.25, 0.37)    | 0.25 (0.21, 0.30)   | <0.0001 |
| Protein (arbitrary value)   | 1.00 (reference)     | NA                   | 0.09 (0.04, 0.20)   | <0.0001 |
| <b>HO1</b>                  |                      |                      |                     |         |
| mRNA (relative fold change) | 1.00 (reference)     | 0.58 (0.44, 0.76)    | 0.27 (0.21, 0.36)   | <0.0001 |
| Protein (arbitrary value)   | 1.00 (reference)     | NA                   | 0.23 (0.07, 0.72)   | <0.0001 |
| <b>KEAP1</b>                |                      |                      |                     |         |
| mRNA (relative fold change) | 1.00 (reference)     | 1.04 (0.78, 1.38)    | 0.85 (0.64, 1.21)   | 0.91    |
| Protein (arbitrary value)   | 1.00 (reference)     | NA                   | 1.19 (0.74, 1.92)   | 0.48    |
| <b>DJ-1</b>                 |                      |                      |                     |         |
| mRNA (relative fold change) | 1.00 (reference)     | 0.71 (0.62, 0.82)    | 0.43 (0.37, 0.82)   | <0.0001 |
| Protein (arbitrary value)   | 1.00 (reference)     | NA                   | 0.15 (0.09, 0.26)   | <0.0001 |
| <b>GSH</b>                  |                      |                      |                     |         |
| (nmole/mg protein)          | 1.00 (reference)     | NA                   | 0.09 (0.03, 0.30)   | 0.003   |
| <b>TBARS</b>                |                      |                      |                     |         |
| (µmole/mg protein)          | 1.00 (reference)     | NA                   | 13.1 (6.5, 26.7)    | <0.0001 |

NA: not available; \*Ratios (95% CIs) and p-values were obtained from a linear regression model on log<sub>2</sub>-transformed mRNA and protein levels comparing GOLD1-2 and GOLD3-4 to non-emphysematous lung samples.
